# Supplementary material
Source: Springer Nature journal article supplement (https://www.springermedizin.de/resource/supplementary/12885_2009_1803_MOESM6_ESM.pdf/9460742)
Supplement: MOESM6 [file 9460742]

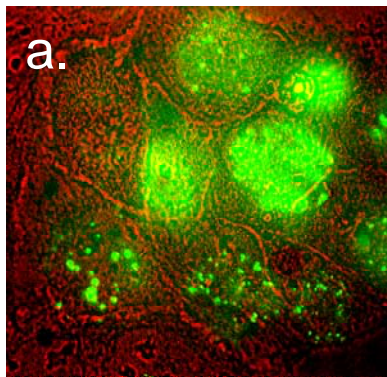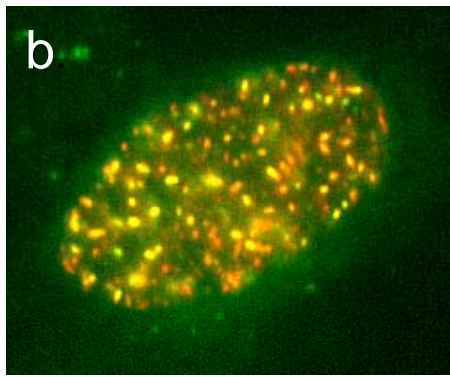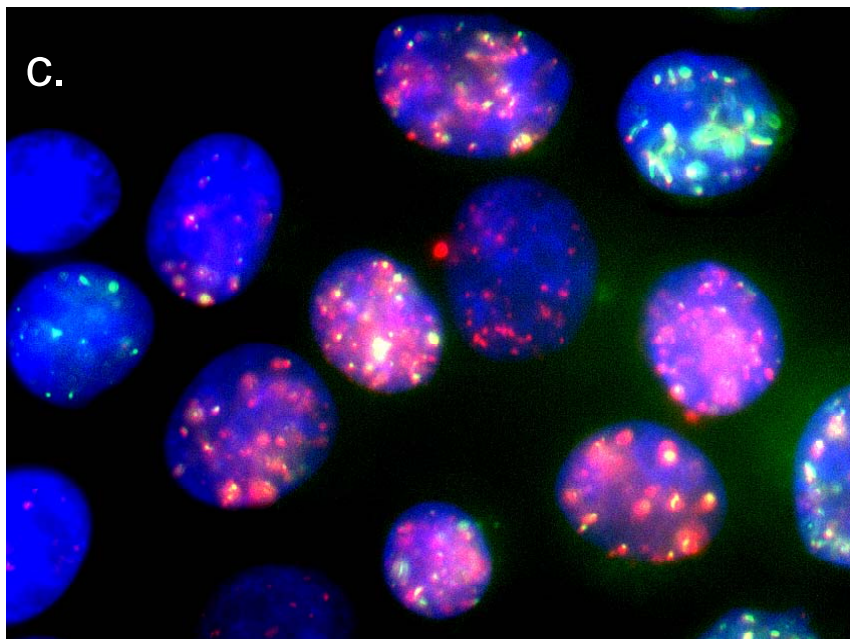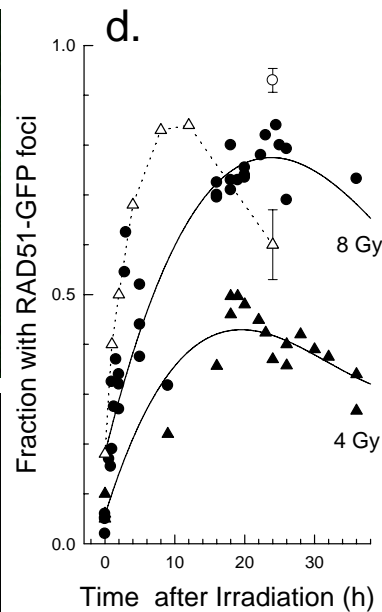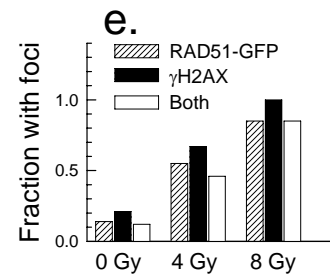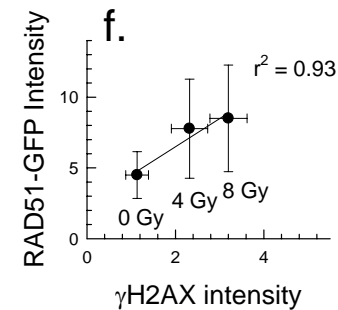

**g.**

|                       | Surviving doublets/<br>total doublets<br>(0 Gy) | Surviving doublets/<br>total doublets<br>(3Gy) |
|-----------------------|-------------------------------------------------|------------------------------------------------|
| RAD51-GFP<br>negative | 24/32<br>(0.75)                                 | 9/11<br>(0.82)                                 |
| RAD51-GFP<br>positive | 1/6<br>(0.17)                                   | 6/38<br>(0.16)                                 |
